# Supplementary material for: Investigation of the deactivation of a washcoated monolith using a spatially resolved technique
Source: Royal Society of Chemistry journal article supplement (doi:10.1039/d2cy01961b), 2023-01-01
Supplement: d2cy01961b1.pdf [file d2cy01961b1.pdf]

1 **Electronic Supplementary Information**

2

3 **Investigation of the Deactivation of a Washcoated Monolith Using a Spatially Resolved Technique**

4 Yuhan Wang,<sup>1</sup> Cristina Stere,<sup>1</sup> Geoffrey McCullough,<sup>2,\*</sup> Mingyang Li,<sup>3</sup> Alexandre Goguet<sup>1,\*</sup>

5 1- School of Chemistry and Chemical Engineering, Queen's University Belfast, BT9 5AG, UK

6 2- School of Mechanical and Aerospace Engineering, Queen's University Belfast, BT9 5AH, UK

7 3- Discipline of Chemical Engineering, Curtin University, Perth, WA 6845, Australia

8 \*Corresponding authors: [g.mccullough@qub.ac.uk](mailto:g.mccullough@qub.ac.uk), [a.goguet@qub.ac.uk](mailto:a.goguet@qub.ac.uk)

9

10 Experiment Description:

11 The monolith core was placed inside a sealed stainless-steel reactor (internal diameter ca. 20 mm, length  
12 200 mm) and heated by a 1 m long tubular split-furnace, manufactured by Carbolite. The temperature  
13 data was recorded continuously with type K Omega thermocouples with an outer diameter of 250  $\mu\text{m}$ .  
14 The thermocouples were connected to a Pico technology 8-port interface which logged the temperature  
15 readings. Open-ended fused silica capillaries (Polymicro Technologies), of outer diameter 220  $\mu\text{m}$ , were  
16 used to sample the gaseous species and were axially inserted inside the monolith channels. A Hiden  
17 HPR20 quartz inlet capillary quadrupole MS was connected to the sampling unit using a heated  
18 capillary. To gain information at various axial positions within the monolith, the capillaries and  
19 thermocouples are moved along the length of the monolith during the experiment. This motion was  
20 provided by a z-motion drive unit consisting of a stepper motor and bellows coupled to a Thorlabs APT  
21 Microstepping Controller (BSC101) toolbox. The smallest movement of the probes is steps of 0.1 mm  
22 with an accuracy of  $\pm 5\%$ . To ensure that no gaseous species fed via the inlet capillary leaked to  
23 neighbouring channels from the upstream face of the monolith core, the inlet capillary was positioned  
24 at a distance of 3 mm into the central channel (Fig. 4(b)). To minimise the impact of unsteady flow at  
25 the exit of the inlet capillary, which may lead to fluctuation artefacts in the MS detection, a gap of 2 mm  
26 between the sampling capillary and the inlet capillary was set up at the starting position.

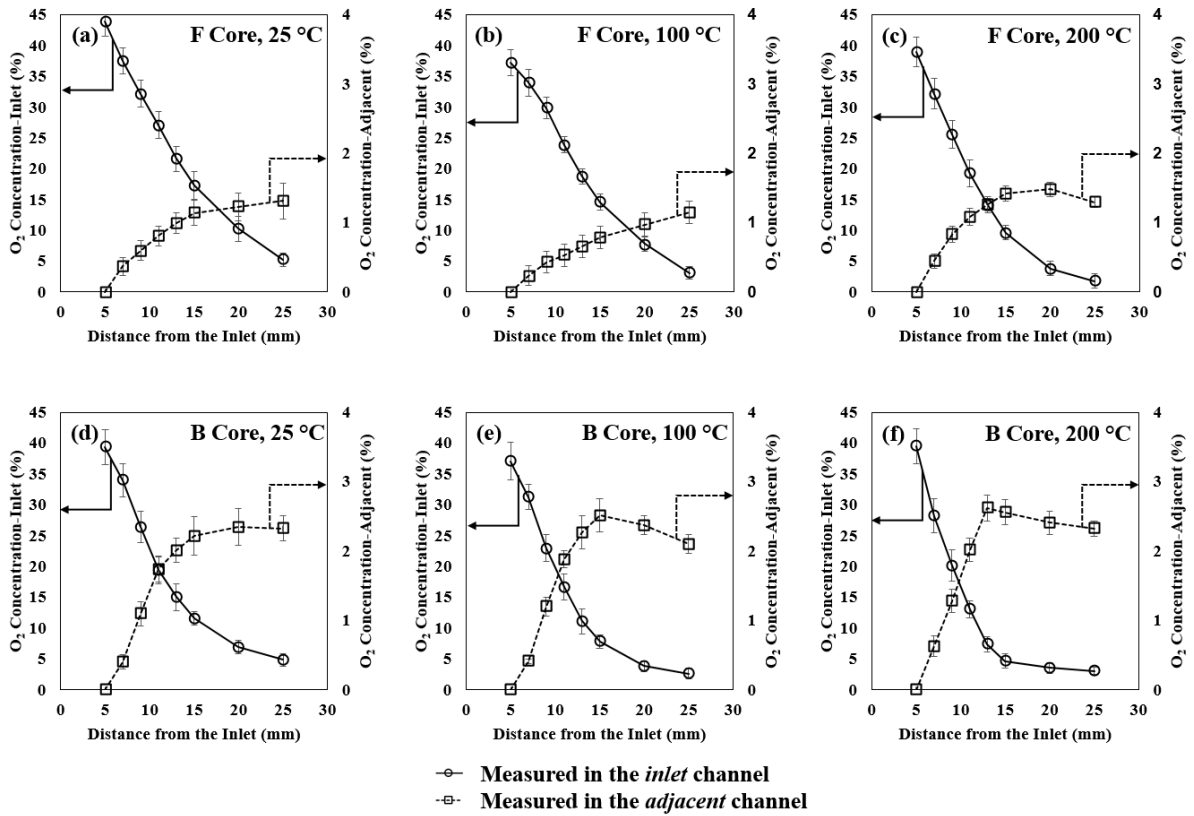

1

2 Fig. S.1. Concentrations profiles for O<sub>2</sub> in the inlet and adjacent channels: (a) F core 25 °C; (b) F core  
 3 100 °C; (c) F core 200 °C; (d) B core 25 °C; (e) B core 100 °C; (f) B core 200 °C. Concentrations inside  
 4 the inlet channel - left axis; Concentrations inside the adjacent channel - right axis.

5

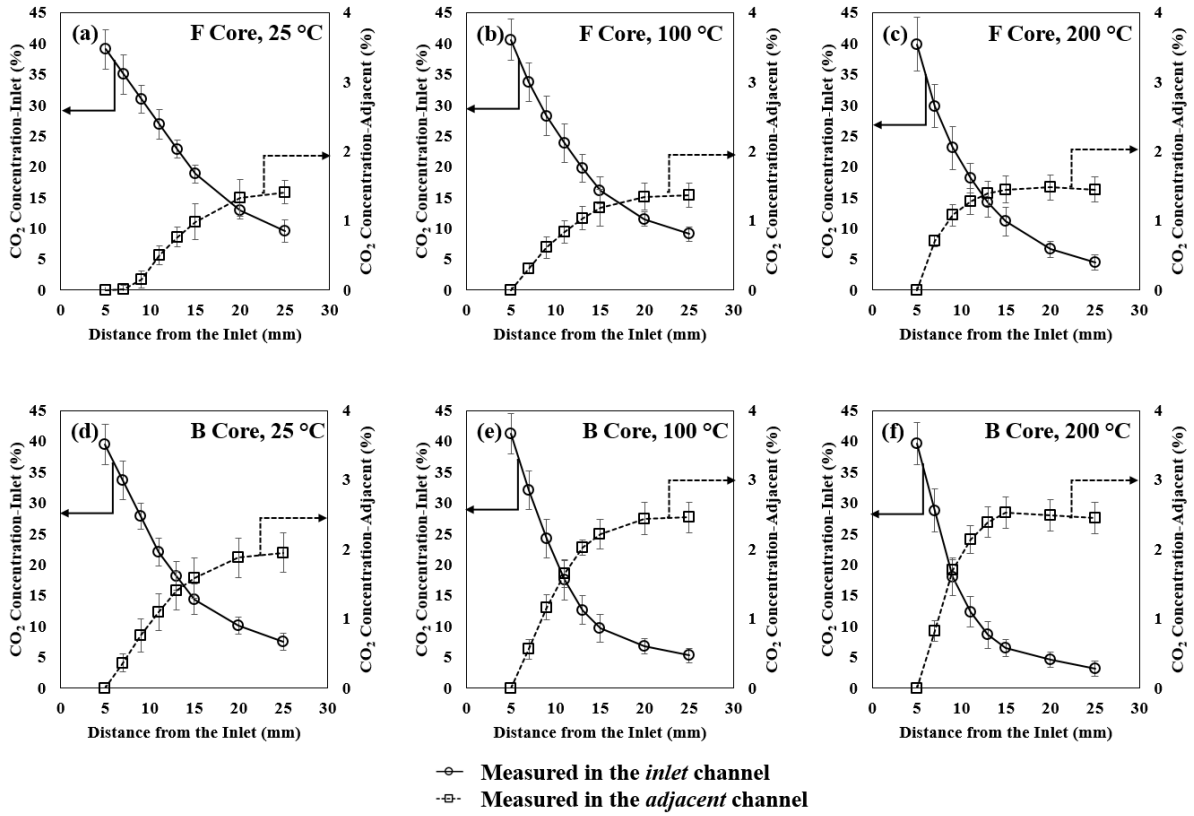

1

2 Fig. S.2. Concentrations profiles for CO<sub>2</sub> in the inlet and adjacent channels: (a) F core 25 °C; (b) F core  
 3 100 °C; (c) F core 200 °C; (d) B core 25 °C; (e) B core 100 °C; (f) B core 200 °C. Concentrations inside  
 4 the inlet channel - left axis; Concentrations inside the adjacent channel - right axis.

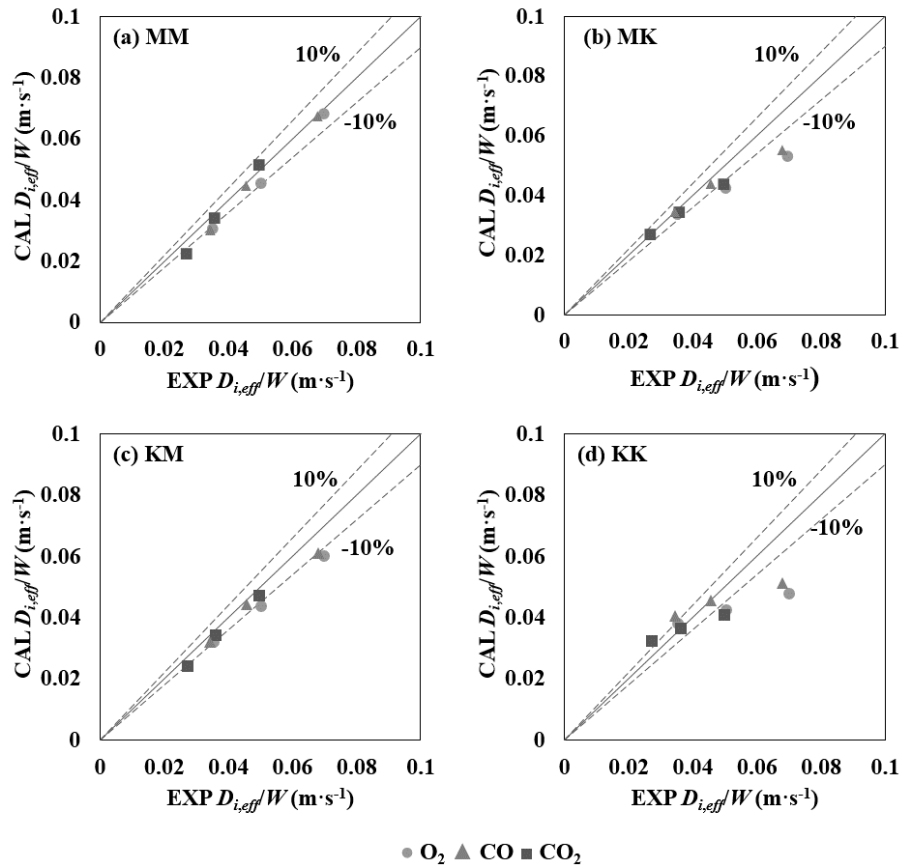

1

2 Fig. S.3. Parity plots of assumptions of  $O_2$ ,  $CO$  and  $CO_2$  diffusion in the B core: (a) substrate: molecular  
 3 diffusion, washcoat: molecular diffusion; (b) substrate: molecular diffusion, washcoat: Knudsen  
 4 diffusion; (c) substrate: Knudsen diffusion, washcoat: molecular diffusion; (d) substrate: Knudsen  
 5 diffusion, washcoat: Knudsen diffusion.

6

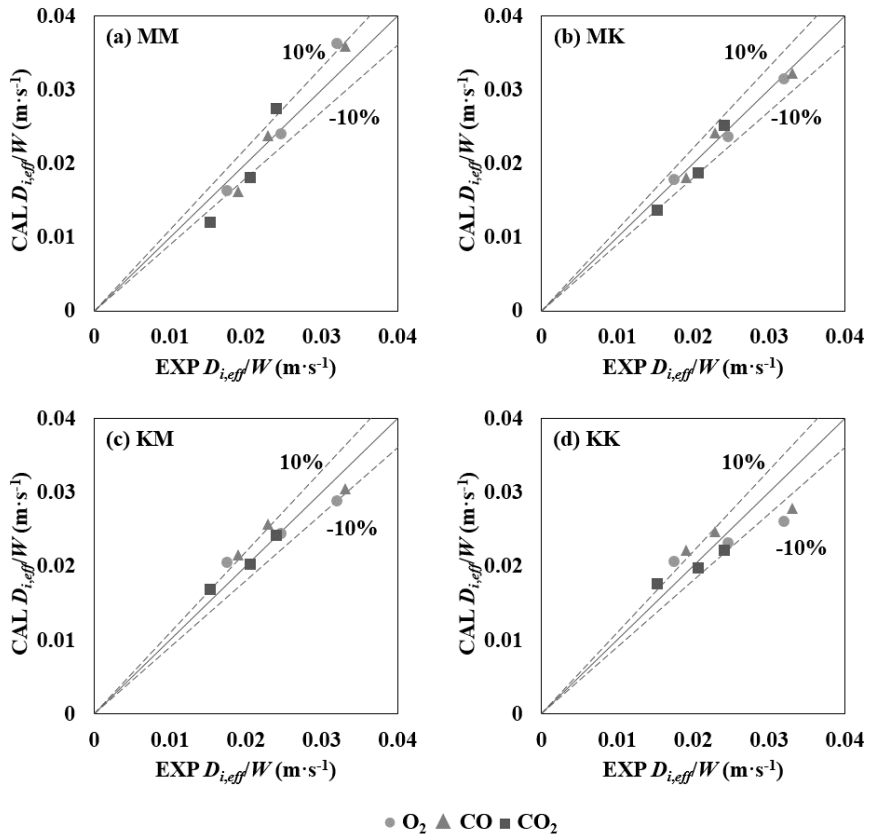

1

2 Fig. S.4. Parity plots of assumptions of  $O_2$ ,  $CO$  and  $CO_2$  diffusion at 9 mm from the entrance of the F  
 3 core: (a) substrate: molecular diffusion, washcoat: molecular diffusion; (b) substrate: molecular  
 4 diffusion, washcoat: Knudsen diffusion; (c) substrate: Knudsen diffusion, washcoat: molecular  
 5 diffusion; (d) substrate: Knudsen diffusion, washcoat: Knudsen diffusion.

6

7

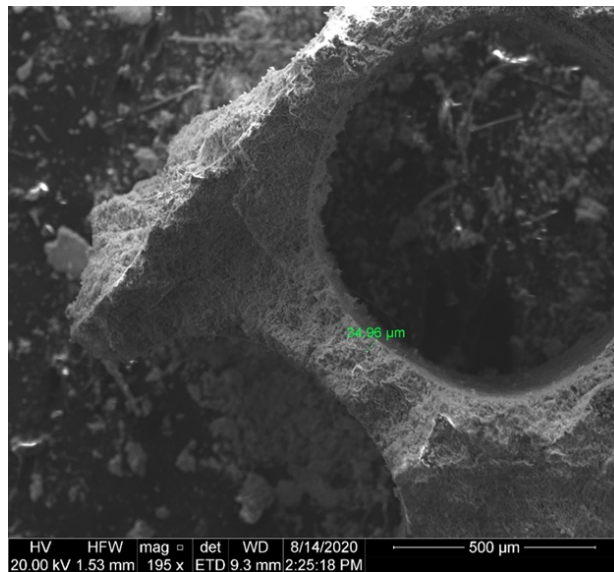

8

1 Fig. S.5. Cross sectional SEM image of the washcoat of the B core.

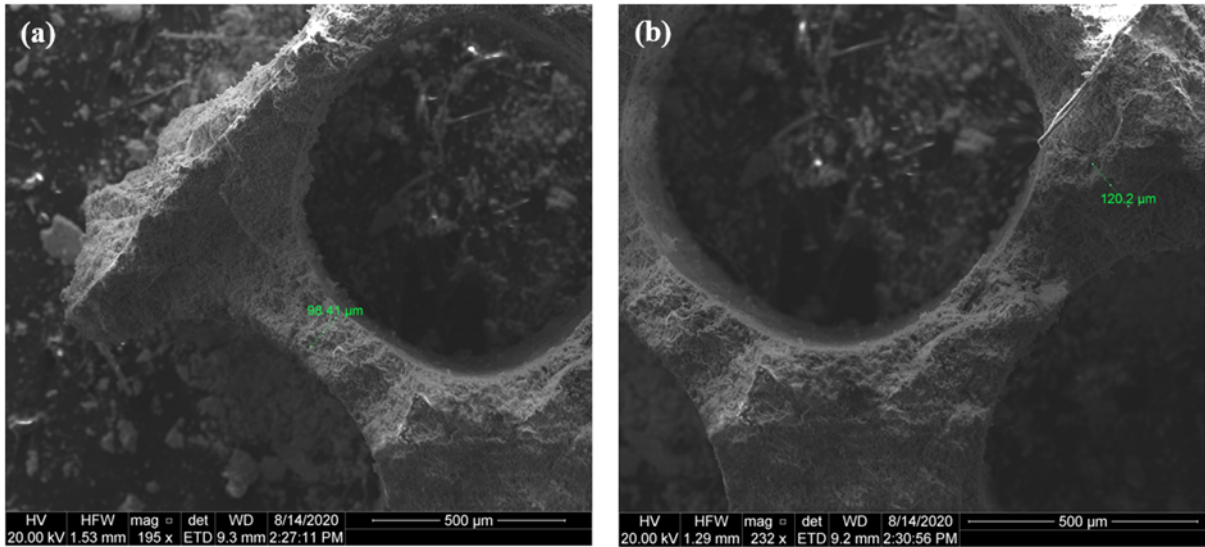

4 Fig. S.6. Cross sectional SEM image of the substrate of the B core.

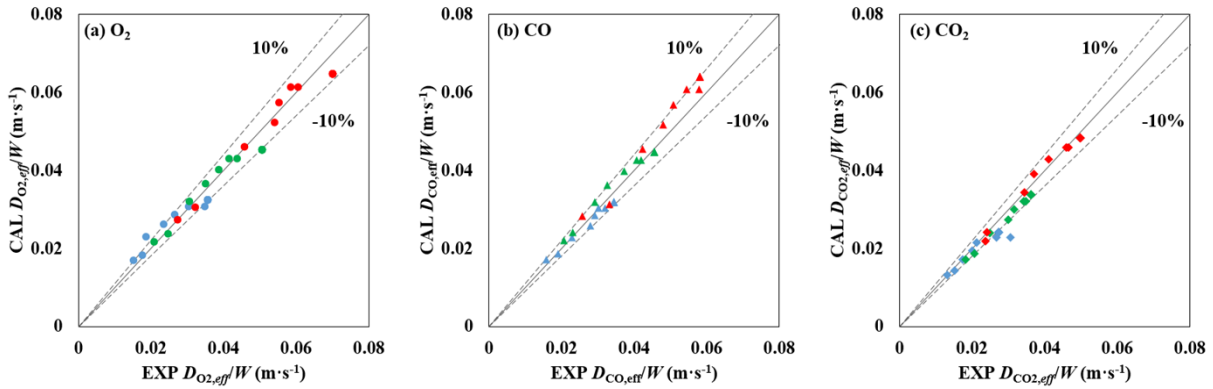

8 Fig. S.7. Parity plots between the experimentally measured and calculated internal mass transfer  
 9 coefficients in the F and B core for (a) O<sub>2</sub>, (b) CO and (c) CO<sub>2</sub> at 25 °C (blue), 100 °C (green) and 200  
 10 °C (red).

11 All the data points in the diffusion experiments were provided as follow:

12 Fig. 5(a): CO, F core, 25 °C

Center

Adjacent

| Distance from the Inlet<br>(mm) | Concentration<br>(%) | Distance from the Inlet<br>(mm) | Concentration<br>(%) |
|---------------------------------|----------------------|---------------------------------|----------------------|
| 5                               | 5.23                 | 5                               | 0.00                 |
| 7                               | 4.64                 | 7                               | 0.08                 |
| 9                               | 4.26                 | 9                               | 0.17                 |
| 11                              | 3.90                 | 11                              | 0.24                 |
| 13                              | 3.53                 | 13                              | 0.29                 |
| 15                              | 3.21                 | 15                              | 0.32                 |
| 20                              | 2.60                 | 20                              | 0.39                 |
| 25                              | 2.01                 | 25                              | 0.45                 |

1

2

3

4 Fig. 5(b): CO, F core, 100 °C

| Center                          |                   | Adjacent                        |                   |
|---------------------------------|-------------------|---------------------------------|-------------------|
| Distance from the Inlet<br>(mm) | Concentration (%) | Distance from the Inlet<br>(mm) | Concentration (%) |
| 5                               | 4.99              | 5                               | 0.00              |
| 7                               | 4.36              | 7                               | 0.13              |
| 9                               | 3.75              | 9                               | 0.24              |
| 11                              | 3.23              | 11                              | 0.32              |
| 13                              | 2.72              | 13                              | 0.39              |
| 15                              | 2.28              | 15                              | 0.42              |
| 20                              | 1.59              | 20                              | 0.46              |
| 25                              | 1.08              | 25                              | 0.51              |

5

6 Fig. 5(c): CO, F core, 200 °C

| Center                          |                      | Adjacent                        |                      |
|---------------------------------|----------------------|---------------------------------|----------------------|
| Distance from the Inlet<br>(mm) | Concentration<br>(%) | Distance from the Inlet<br>(mm) | Concentration<br>(%) |
| 5                               | 4.78                 | 5                               | 0.00                 |
| 7                               | 3.99                 | 7                               | 0.21                 |
| 9                               | 3.10                 | 9                               | 0.36                 |
| 11                              | 2.43                 | 11                              | 0.44                 |
| 13                              | 1.86                 | 13                              | 0.48                 |
| 15                              | 1.50                 | 15                              | 0.51                 |
| 20                              | 1.00                 | 20                              | 0.54                 |
| 25                              | 0.70                 | 25                              | 0.55                 |

1

2

3 Fig. 5(d): CO, B core, 25 °C

| Center                          |                      | Adjacent                        |                      |
|---------------------------------|----------------------|---------------------------------|----------------------|
| Distance from the Inlet<br>(mm) | Concentration<br>(%) | Distance from the Inlet<br>(mm) | Concentration<br>(%) |
| 5                               | 4.73                 | 5                               | 0.00                 |
| 7                               | 4.30                 | 7                               | 0.12                 |
| 9                               | 3.83                 | 9                               | 0.22                 |
| 11                              | 3.30                 | 11                              | 0.31                 |
| 13                              | 2.79                 | 13                              | 0.39                 |
| 15                              | 2.37                 | 15                              | 0.45                 |
| 20                              | 1.74                 | 20                              | 0.52                 |
| 25                              | 1.32                 | 25                              | 0.55                 |

4

5 Fig. 5(e): CO, B core, 100 °C



| Center                          |                      | Adjacent                        |                      |
|---------------------------------|----------------------|---------------------------------|----------------------|
| Distance from the Inlet<br>(mm) | Concentration<br>(%) | Distance from the Inlet<br>(mm) | Concentration<br>(%) |
| 5                               | 5.39                 | 5                               | 0.00                 |
| 7                               | 4.06                 | 7                               | 0.18                 |
| 9                               | 3.22                 | 9                               | 0.33                 |
| 11                              | 2.57                 | 11                              | 0.42                 |
| 13                              | 2.05                 | 13                              | 0.49                 |
| 15                              | 1.70                 | 15                              | 0.54                 |
| 20                              | 1.16                 | 20                              | 0.57                 |
| 25                              | 0.87                 | 25                              | 0.58                 |

1

2

3 Fig. 5(f): CO, B core, 200 °C

| Center                          |                      | Adjacent                        |                      |
|---------------------------------|----------------------|---------------------------------|----------------------|
| Distance from the Inlet<br>(mm) | Concentration<br>(%) | Distance from the Inlet<br>(mm) | Concentration<br>(%) |
| 5                               | 4.88                 | 5                               | 0.00                 |
| 7                               | 3.68                 | 7                               | 0.24                 |
| 9                               | 2.71                 | 9                               | 0.40                 |
| 11                              | 2.06                 | 11                              | 0.50                 |
| 13                              | 1.55                 | 13                              | 0.56                 |
| 15                              | 1.26                 | 15                              | 0.58                 |
| 20                              | 0.85                 | 20                              | 0.61                 |
| 25                              | 0.72                 | 25                              | 0.62                 |

4

5 Fig. S.1(a): O<sub>2</sub>, F core, 25 °C

| Center                          |                      | Adjacent                        |                      |
|---------------------------------|----------------------|---------------------------------|----------------------|
| Distance from the Inlet<br>(mm) | Concentration<br>(%) | Distance from the Inlet<br>(mm) | Concentration<br>(%) |
| 5                               | 43.86                | 5                               | 0.00                 |
| 7                               | 37.51                | 7                               | 0.37                 |
| 9                               | 32.17                | 9                               | 0.60                 |
| 11                              | 27.09                | 11                              | 0.81                 |
| 13                              | 21.61                | 13                              | 0.99                 |
| 15                              | 17.33                | 15                              | 1.14                 |
| 20                              | 10.29                | 20                              | 1.23                 |
| 25                              | 5.27                 | 25                              | 1.32                 |

1

2

3 Fig. S.1(b): O<sub>2</sub>, F core, 100 °C

| Center                          |                      | Adjacent                        |                      |
|---------------------------------|----------------------|---------------------------------|----------------------|
| Distance from the Inlet<br>(mm) | Concentration<br>(%) | Distance from the Inlet<br>(mm) | Concentration<br>(%) |
| 5                               | 37.16                | 5                               | 0.00                 |
| 7                               | 33.96                | 7                               | 0.24                 |
| 9                               | 29.88                | 9                               | 0.43                 |
| 11                              | 23.91                | 11                              | 0.53                 |
| 13                              | 18.79                | 13                              | 0.66                 |
| 15                              | 14.60                | 15                              | 0.79                 |
| 20                              | 7.81                 | 20                              | 0.97                 |
| 25                              | 3.12                 | 25                              | 1.15                 |

4

5 Fig. S.1(c): O<sub>2</sub>, F core, 200 °C

| Center                          |                      | Adjacent                        |                      |
|---------------------------------|----------------------|---------------------------------|----------------------|
| Distance from the Inlet<br>(mm) | Concentration<br>(%) | Distance from the Inlet<br>(mm) | Concentration<br>(%) |
| 5                               | 38.99                | 5                               | 0.00                 |
| 7                               | 32.19                | 7                               | 0.45                 |
| 9                               | 25.61                | 9                               | 0.83                 |
| 11                              | 19.26                | 11                              | 1.08                 |
| 13                              | 14.04                | 13                              | 1.27                 |
| 15                              | 9.61                 | 15                              | 1.42                 |
| 20                              | 3.83                 | 20                              | 1.48                 |
| 25                              | 1.80                 | 25                              | 1.30                 |

1

2

3 Fig. S.1(d): O<sub>2</sub>, B core, 25 °C

| Center                          |                      | Adjacent                        |                      |
|---------------------------------|----------------------|---------------------------------|----------------------|
| Distance from the Inlet<br>(mm) | Concentration<br>(%) | Distance from the Inlet<br>(mm) | Concentration<br>(%) |
| 5                               | 39.40                | 5                               | 0.00                 |
| 7                               | 34.02                | 7                               | 0.40                 |
| 9                               | 26.40                | 9                               | 1.09                 |
| 11                              | 19.43                | 11                              | 1.74                 |
| 13                              | 15.06                | 13                              | 2.01                 |
| 15                              | 11.57                | 15                              | 2.22                 |
| 20                              | 6.93                 | 20                              | 2.35                 |
| 25                              | 4.85                 | 25                              | 2.32                 |

4

5 Fig. S.1(e): O<sub>2</sub>, B core, 100 °C

| Center                          |                      | Adjacent                        |                      |
|---------------------------------|----------------------|---------------------------------|----------------------|
| Distance from the Inlet<br>(mm) | Concentration<br>(%) | Distance from the Inlet<br>(mm) | Concentration<br>(%) |
| 5                               | 37.10                | 5                               | 0.00                 |
| 7                               | 31.29                | 7                               | 0.41                 |
| 9                               | 22.98                | 9                               | 1.20                 |
| 11                              | 16.65                | 11                              | 1.88                 |
| 13                              | 11.12                | 13                              | 2.27                 |
| 15                              | 7.84                 | 15                              | 2.51                 |
| 20                              | 3.83                 | 20                              | 2.37                 |
| 25                              | 2.64                 | 25                              | 2.10                 |

1

2

3 Fig. S.1(f): O<sub>2</sub>, B core, 200 °C

| Center                          |                      | Adjacent                        |                      |
|---------------------------------|----------------------|---------------------------------|----------------------|
| Distance from the Inlet<br>(mm) | Concentration<br>(%) | Distance from the Inlet<br>(mm) | Concentration<br>(%) |
| 5                               | 39.50                | 5                               | 0.00                 |
| 7                               | 28.24                | 7                               | 0.63                 |
| 9                               | 20.17                | 9                               | 1.28                 |
| 11                              | 13.03                | 11                              | 2.01                 |
| 13                              | 7.44                 | 13                              | 2.62                 |
| 15                              | 4.66                 | 15                              | 2.56                 |
| 20                              | 3.53                 | 20                              | 2.41                 |
| 25                              | 3.07                 | 25                              | 2.32                 |

4

5 Fig. S.2(a): CO<sub>2</sub>, F core, 25 °C

| Center                          |                      | Adjacent                        |                      |
|---------------------------------|----------------------|---------------------------------|----------------------|
| Distance from the Inlet<br>(mm) | Concentration<br>(%) | Distance from the Inlet<br>(mm) | Concentration<br>(%) |
| 5                               | 39.05                | 5                               | 0.00                 |
| 7                               | 35.01                | 7                               | 0.01                 |
| 9                               | 30.97                | 9                               | 0.16                 |
| 11                              | 26.93                | 11                              | 0.50                 |
| 13                              | 22.89                | 13                              | 0.77                 |
| 15                              | 18.85                | 15                              | 0.99                 |
| 20                              | 12.93                | 20                              | 1.33                 |
| 25                              | 9.58                 | 25                              | 1.41                 |

1

2

3 Fig. S.2(b): CO<sub>2</sub>, F core, 100 °C

| Center                          |                      | Adjacent                        |                      |
|---------------------------------|----------------------|---------------------------------|----------------------|
| Distance from the Inlet<br>(mm) | Concentration<br>(%) | Distance from the Inlet<br>(mm) | Concentration<br>(%) |
| 5                               | 40.63                | 5                               | 0.00                 |
| 7                               | 33.72                | 7                               | 0.31                 |
| 9                               | 28.28                | 9                               | 0.61                 |
| 11                              | 23.89                | 11                              | 0.84                 |
| 13                              | 19.74                | 13                              | 1.04                 |
| 15                              | 16.15                | 15                              | 1.19                 |
| 20                              | 11.49                | 20                              | 1.35                 |
| 25                              | 9.12                 | 25                              | 1.37                 |

4

5 Fig. S.2(c): CO<sub>2</sub>, F core, 200 °C

| Center                       |                   | Adjacent                     |                   |
|------------------------------|-------------------|------------------------------|-------------------|
| Distance from the Inlet (mm) | Concentration (%) | Distance from the Inlet (mm) | Concentration (%) |
| 5                            | 39.85             | 5                            | 0.00              |
| 7                            | 29.87             | 7                            | 0.71              |
| 9                            | 23.08             | 9                            | 1.08              |
| 11                           | 18.15             | 11                           | 1.28              |
| 13                           | 14.19             | 13                           | 1.40              |
| 15                           | 11.13             | 15                           | 1.45              |
| 20                           | 6.63              | 20                           | 1.48              |
| 25                           | 4.45              | 25                           | 1.45              |

1

2

3 Fig. S.2(d): CO<sub>2</sub>, B core, 25 °C

| Center                       |                   | Adjacent                     |                   |
|------------------------------|-------------------|------------------------------|-------------------|
| Distance from the Inlet (mm) | Concentration (%) | Distance from the Inlet (mm) | Concentration (%) |
| 5                            | 39.52             | 5                            | 0.00              |
| 7                            | 33.70             | 7                            | 0.36              |
| 9                            | 27.88             | 9                            | 0.76              |
| 11                           | 22.06             | 11                           | 1.09              |
| 13                           | 18.20             | 13                           | 1.41              |
| 15                           | 14.40             | 15                           | 1.59              |
| 20                           | 10.18             | 20                           | 1.88              |
| 25                           | 7.53              | 25                           | 1.95              |

4

5 Fig. S.2(e): CO<sub>2</sub>, B core, 100 °C

| Center                       |                   | Adjacent                     |                   |
|------------------------------|-------------------|------------------------------|-------------------|
| Distance from the Inlet (mm) | Concentration (%) | Distance from the Inlet (mm) | Concentration (%) |
| 5                            | 41.29             | 5                            | 0.00              |
| 7                            | 32.10             | 7                            | 0.56              |
| 9                            | 24.20             | 9                            | 1.16              |
| 11                           | 17.50             | 11                           | 1.65              |
| 13                           | 12.65             | 13                           | 2.03              |
| 15                           | 9.72              | 15                           | 2.22              |
| 20                           | 6.79              | 20                           | 2.44              |
| 25                           | 5.26              | 25                           | 2.46              |

1

2

3 Fig. S.2(f): CO<sub>2</sub>, B core, 200 °C

| Center                       |                   | Adjacent                     |                   |
|------------------------------|-------------------|------------------------------|-------------------|
| Distance from the Inlet (mm) | Concentration (%) | Distance from the Inlet (mm) | Concentration (%) |
| 5                            | 39.66             | 5                            | 0.00              |
| 7                            | 28.79             | 7                            | 0.82              |
| 9                            | 17.92             | 9                            | 1.70              |
| 11                           | 12.33             | 11                           | 2.14              |
| 13                           | 8.66              | 13                           | 2.39              |
| 15                           | 6.52              | 15                           | 2.53              |
| 20                           | 4.60              | 20                           | 2.49              |
| 25                           | 3.17              | 25                           | 2.45              |

4

5

1  
2  
3  
4  
5  
6  
7  
8  
9  
10  
11

12 Fig. 6: Overall mass transfer coefficients for O<sub>2</sub>

| Core | Distance from F<br>Core Inlet (mm) | $k_{overall}$ (m·s <sup>-1</sup> ) |             |             |
|------|------------------------------------|------------------------------------|-------------|-------------|
|      |                                    | 25 °C                              | 100 °C      | 200 °C      |
| F    | 7                                  | 0.00670475                         | 0.016621291 | 0.024130207 |
|      | 9                                  | 0.011435223                        | 0.018519482 | 0.026735835 |
|      | 11                                 | 0.013579553                        | 0.020839015 | 0.028589323 |
|      | 13                                 | 0.015818881                        | 0.022319029 | 0.030211506 |
|      | 15                                 | 0.017011043                        | 0.023304455 | 0.031882079 |
|      | 20                                 | 0.018299829                        | 0.024571747 | 0.033890715 |
|      | 25                                 | 0.019647872                        | 0.026174015 | 0.035598542 |
| B    | 37                                 | 0.019888998                        | 0.029024759 | 0.03932411  |
|      | 39                                 | 0.020328181                        | 0.029809997 | 0.040301608 |
|      | 41                                 | 0.020562064                        | 0.030476806 | 0.041419011 |



|    |             |             |             |
|----|-------------|-------------|-------------|
| 43 | 0.020885758 | 0.030872363 | 0.042158568 |
| 45 | 0.021118373 | 0.031048849 | 0.042601651 |
| 50 | 0.021274356 | 0.031366675 | 0.042687855 |
| 55 | 0.021040518 | 0.031597333 | 0.042817398 |

1

2

3

4

5

6

7

8

9 Overall mass transfer coefficients for CO

| Core | Distance from F<br>Core Inlet (mm) | $k_{overall}$ (m·s <sup>-1</sup> ) |             |             |
|------|------------------------------------|------------------------------------|-------------|-------------|
|      |                                    | 25 °C                              | 100 °C      | 200 °C      |
| F    | 7                                  | 0.00984938                         | 0.017950116 | 0.030162562 |
|      | 9                                  | 0.010629261                        | 0.019294525 | 0.032580984 |
|      | 11                                 | 0.011109324                        | 0.019870852 | 0.033653377 |
|      | 13                                 | 0.011743442                        | 0.020845658 | 0.035105242 |
|      | 15                                 | 0.01206508                         | 0.021748378 | 0.036348954 |
|      | 20                                 | 0.01371811                         | 0.023692548 | 0.037853509 |
|      | 25                                 | 0.015104562                        | 0.025485341 | 0.03917486  |
| B    | 37                                 | 0.017870312                        | 0.027963122 | 0.041528341 |
|      | 39                                 | 0.018203868                        | 0.028910727 | 0.042647424 |
|      | 41                                 | 0.018582503                        | 0.029821763 | 0.042906785 |

|    |             |             |             |
|----|-------------|-------------|-------------|
| 43 | 0.018906459 | 0.030068333 | 0.043052905 |
| 45 | 0.019353902 | 0.030224271 | 0.04308983  |
| 50 | 0.019700898 | 0.03058382  | 0.043323751 |
| 55 | 0.01982811  | 0.030960736 | 0.04313049  |

1

2

3

4

5

6

7

8

9 Overall mass transfer coefficients for CO<sub>2</sub>

| Core | Distance from F<br>Core Inlet (mm) | $k_{overall}$ (m·s <sup>-1</sup> ) |             |             |
|------|------------------------------------|------------------------------------|-------------|-------------|
|      |                                    | 25 °C                              | 100 °C      | 200 °C      |
| F    | 7                                  | 0.009959537                        | 0.015344584 | 0.024673621 |
|      | 9                                  | 0.010552628                        | 0.016162655 | 0.025369346 |
|      | 11                                 | 0.011188727                        | 0.017599126 | 0.026112344 |
|      | 13                                 | 0.012004503                        | 0.018209081 | 0.026676133 |
|      | 15                                 | 0.012213037                        | 0.018786441 | 0.027318019 |
|      | 20                                 | 0.013482134                        | 0.020266474 | 0.029262834 |
|      | 25                                 | 0.014189246                        | 0.02146544  | 0.030571657 |
| B    | 37                                 | 0.015254099                        | 0.024187299 | 0.032646431 |
|      | 39                                 | 0.015733886                        | 0.024220622 | 0.03308341  |
|      | 41                                 | 0.015809943                        | 0.024611458 | 0.034244065 |

|    |             |             |             |
|----|-------------|-------------|-------------|
| 43 | 0.015989097 | 0.024520025 | 0.034687429 |
| 45 | 0.016356387 | 0.024547167 | 0.035192668 |
| 50 | 0.016429701 | 0.024565936 | 0.035025932 |
| 55 | 0.016411604 | 0.024294838 | 0.034721672 |

1

2

3

4

5

6

7

8

9 Fig. 7: Mass transfer coefficients for O<sub>2</sub> at 25 °C in the F core

| Distance from the Inlet (mm) | $k_{m1}$ (m·s <sup>-1</sup> ) | $k_{m2}$ (m·s <sup>-1</sup> ) | $D_{O_2,eff}/W$<br>(m·s <sup>-1</sup> ) |
|------------------------------|-------------------------------|-------------------------------|-----------------------------------------|
| 7                            | 0.141670048                   | 0.114665681                   | 0.014980316                             |
| 9                            | 0.117678537                   | 0.101306368                   | 0.017475901                             |
| 11                           | 0.10820752                    | 0.096342913                   | 0.018511994                             |
| 13                           | 0.10306848                    | 0.093739863                   | 0.023339679                             |
| 15                           | 0.09982867                    | 0.092134699                   | 0.026375128                             |
| 20                           | 0.095297804                   | 0.089939767                   | 0.030272441                             |
| 25                           | 0.092930448                   | 0.088817351                   | 0.034630477                             |

10

11 Mass transfer coefficients for O<sub>2</sub> at 25 °C in the B core

| Distance from the Inlet (mm) | $k_{m1}$ (m·s <sup>-1</sup> ) | $k_{m2}$ (m·s <sup>-1</sup> ) | $D_{O_2,eff}/W$ |
|------------------------------|-------------------------------|-------------------------------|-----------------|
|------------------------------|-------------------------------|-------------------------------|-----------------|

|  |    |             |             | (m·s <sup>-1</sup> ) |
|--|----|-------------|-------------|----------------------|
|  | 7  | 0.141670048 | 0.114665681 | 0.028986017          |
|  | 9  | 0.117678537 | 0.101306368 | 0.032442232          |
|  | 11 | 0.10820752  | 0.096342913 | 0.034468309          |
|  | 13 | 0.10306848  | 0.093739863 | 0.036351197          |
|  | 15 | 0.09982867  | 0.092134699 | 0.037762503          |
|  | 20 | 0.095297804 | 0.089939767 | 0.039380971          |
|  | 25 | 0.092930448 | 0.088817351 | 0.03920408           |

1

2

3

4

5

6 Mass transfer coefficients for O<sub>2</sub> at 100 °C in the F core

| Distance from the Inlet (mm) | $k_{m1}$ (m·s <sup>-1</sup> ) | $k_{m2}$ (m·s <sup>-1</sup> ) | $D_{O_2,eff}/W$<br>(m·s <sup>-1</sup> ) |
|------------------------------|-------------------------------|-------------------------------|-----------------------------------------|
| 7                            | 0.182870793                   | 0.154329075                   | 0.020740091                             |
| 9                            | 0.157443704                   | 0.140863848                   | 0.024662943                             |
| 11                           | 0.147759454                   | 0.136009448                   | 0.030527507                             |
| 13                           | 0.142613211                   | 0.133500934                   | 0.03500084                              |
| 15                           | 0.139413392                   | 0.131967767                   | 0.038511705                             |
| 20                           | 0.135001918                   | 0.129889032                   | 0.041390763                             |
| 25                           | 0.132728664                   | 0.128834256                   | 0.043649533                             |

7

8 Mass transfer coefficients for O<sub>2</sub> at 100 °C in the B core

| Distance from the Inlet (mm) | $k_{m1}$ (m·s <sup>-1</sup> ) | $k_{m2}$ (m·s <sup>-1</sup> ) | $D_{O_2,eff}/W$ |
|------------------------------|-------------------------------|-------------------------------|-----------------|
|------------------------------|-------------------------------|-------------------------------|-----------------|

|  |    |             |             | (m·s <sup>-1</sup> ) |
|--|----|-------------|-------------|----------------------|
|  | 7  | 0.182870793 | 0.154329075 | 0.044433896          |
|  | 9  | 0.157443704 | 0.140863848 | 0.04676297           |
|  | 11 | 0.147759454 | 0.136009448 | 0.048499823          |
|  | 13 | 0.142613211 | 0.133500934 | 0.05190067           |
|  | 15 | 0.139413392 | 0.131967767 | 0.052284289          |
|  | 20 | 0.135001918 | 0.129889032 | 0.053613274          |
|  | 25 | 0.132728664 | 0.128834256 | 0.055153992          |

1

2

3

4

5

6 Mass transfer coefficients for O<sub>2</sub> at 200 °C in the F core

| Distance from the Inlet (mm) | $k_{m1}$ (m·s <sup>-1</sup> ) | $k_{m2}$ (m·s <sup>-1</sup> ) | $D_{O_2,eff}/W$<br>(m·s <sup>-1</sup> ) |
|------------------------------|-------------------------------|-------------------------------|-----------------------------------------|
| 7                            | 0.256561607                   | 0.222428654                   | 0.02723286                              |
| 9                            | 0.226085344                   | 0.206767168                   | 0.031978946                             |
| 11                           | 0.214734645                   | 0.201212685                   | 0.045501115                             |
| 13                           | 0.208774364                   | 0.198363874                   | 0.053867828                             |
| 15                           | 0.205096121                   | 0.196630318                   | 0.055204795                             |
| 20                           | 0.200062622                   | 0.194289432                   | 0.058464847                             |
| 25                           | 0.197486858                   | 0.19310596                    | 0.060423259                             |

7

8 Mass transfer coefficients for O<sub>2</sub> at 200 °C in the B core

| Distance from the Inlet (mm) | $k_{m1}$ (m·s <sup>-1</sup> ) | $k_{m2}$ (m·s <sup>-1</sup> ) | $D_{O_2,eff}/W$ |
|------------------------------|-------------------------------|-------------------------------|-----------------|
|------------------------------|-------------------------------|-------------------------------|-----------------|

|  |    |             |             | (m·s <sup>-1</sup> ) |
|--|----|-------------|-------------|----------------------|
|  | 7  | 0.256561607 | 0.222428654 | 0.058698643          |
|  | 9  | 0.226085344 | 0.206767168 | 0.06429446           |
|  | 11 | 0.214734645 | 0.201212685 | 0.068886054          |
|  | 13 | 0.208774364 | 0.198363874 | 0.072000098          |
|  | 15 | 0.205096121 | 0.196630318 | 0.074009274          |
|  | 20 | 0.200062622 | 0.194289432 | 0.075298532          |
|  | 25 | 0.197486858 | 0.19310596  | 0.076261014          |

1

2

3

4

5

6 Mass transfer coefficients for CO at 25 °C in the F core

| Distance from the Inlet (mm) | $k_{m1}$ (m·s <sup>-1</sup> ) | $k_{m2}$ (m·s <sup>-1</sup> ) | $D_{CO,eff}/W$<br>(m·s <sup>-1</sup> ) |
|------------------------------|-------------------------------|-------------------------------|----------------------------------------|
| 7                            | 0.25282657                    | 0.187418369                   | 0.015841483                            |
| 9                            | 0.202990259                   | 0.16182338                    | 0.019051968                            |
| 11                           | 0.182600303                   | 0.15210244                    | 0.022826511                            |
| 13                           | 0.171276871                   | 0.146944635                   | 0.027911769                            |
| 15                           | 0.164019673                   | 0.14374078                    | 0.029143205                            |
| 20                           | 0.153684851                   | 0.139328097                   | 0.030168884                            |
| 25                           | 0.148184039                   | 0.137056344                   | 0.031917159                            |

7

8 Mass transfer coefficients for CO at 25 °C in the B core

| Distance from the Inlet (mm) | $k_{m1}$ (m·s <sup>-1</sup> ) | $k_{m2}$ (m·s <sup>-1</sup> ) | $D_{CO,eff}/W$ |
|------------------------------|-------------------------------|-------------------------------|----------------|
|------------------------------|-------------------------------|-------------------------------|----------------|

|  |    |             |             | (m·s <sup>-1</sup> ) |
|--|----|-------------|-------------|----------------------|
|  | 7  | 0.25282657  | 0.187418369 | 0.032142805          |
|  | 9  | 0.202990259 | 0.16182338  | 0.032281675          |
|  | 11 | 0.182600303 | 0.15210244  | 0.032394458          |
|  | 13 | 0.171276871 | 0.146944635 | 0.033484584          |
|  | 15 | 0.164019673 | 0.14374078  | 0.035896424          |
|  | 20 | 0.153684851 | 0.139328097 | 0.036697237          |
|  | 25 | 0.148184039 | 0.137056344 | 0.037480971          |

1

2

3

4

5

6 Mass transfer coefficients for CO at 100 °C in the F core

| Distance from the Inlet (mm) | $k_{m1}$ (m·s <sup>-1</sup> ) | $k_{m2}$ (m·s <sup>-1</sup> ) | $D_{CO,eff}/W$<br>(m·s <sup>-1</sup> ) |
|------------------------------|-------------------------------|-------------------------------|----------------------------------------|
| 7                            | 0.328784289                   | 0.253157896                   | 0.020526153                            |
| 9                            | 0.270833312                   | 0.22480641                    | 0.022889793                            |
| 11                           | 0.247758181                   | 0.214323215                   | 0.029025222                            |
| 13                           | 0.235170127                   | 0.208838775                   | 0.032568647                            |
| 15                           | 0.227204807                   | 0.205461868                   | 0.037239018                            |
| 20                           | 0.216021083                   | 0.200850915                   | 0.04067544                             |
| 25                           | 0.210154466                   | 0.198496184                   | 0.041965132                            |

7

8 Mass transfer coefficients for CO at 100 °C in the B core

| Distance from the Inlet (mm) | $k_{m1}$ (m·s <sup>-1</sup> ) | $k_{m2}$ (m·s <sup>-1</sup> ) | $D_{CO,eff}/W$ |
|------------------------------|-------------------------------|-------------------------------|----------------|
|------------------------------|-------------------------------|-------------------------------|----------------|

|  |    |             |             | (m·s <sup>-1</sup> ) |
|--|----|-------------|-------------|----------------------|
|  | 7  | 0.328784289 | 0.253157896 | 0.04347587           |
|  | 9  | 0.270833312 | 0.22480641  | 0.04378091           |
|  | 11 | 0.247758181 | 0.214323215 | 0.044273028          |
|  | 13 | 0.235170127 | 0.208838775 | 0.045293381          |
|  | 15 | 0.227204807 | 0.205461868 | 0.046985768          |
|  | 20 | 0.216021083 | 0.200850915 | 0.047310608          |
|  | 25 | 0.210154466 | 0.198496184 | 0.048439133          |

1

2

3

4

5

6 Mass transfer coefficients for CO at 200 °C in the F core

| Distance from the Inlet (mm) | $k_{m1}$ (m·s <sup>-1</sup> ) | $k_{m2}$ (m·s <sup>-1</sup> ) | $D_{CO,eff}/W$<br>(m·s <sup>-1</sup> ) |
|------------------------------|-------------------------------|-------------------------------|----------------------------------------|
| 7                            | 0.439218812                   | 0.35351833                    | 0.025652906                            |
| 9                            | 0.373124371                   | 0.322871136                   | 0.03313571                             |
| 11                           | 0.347617594                   | 0.311828515                   | 0.042317144                            |
| 13                           | 0.333962426                   | 0.306123714                   | 0.047994837                            |
| 15                           | 0.325431054                   | 0.302637557                   | 0.050731717                            |
| 20                           | 0.31361168                    | 0.297911551                   | 0.054321372                            |
| 25                           | 0.307492651                   | 0.295513826                   | 0.057936582                            |

7

8 Mass transfer coefficients for CO at 200 °C in the B core

| Distance from the Inlet (mm) | $k_{m1}$ (m·s <sup>-1</sup> ) | $k_{m2}$ (m·s <sup>-1</sup> ) | $D_{CO,eff}/W$ |
|------------------------------|-------------------------------|-------------------------------|----------------|
|------------------------------|-------------------------------|-------------------------------|----------------|



|  |    |             |             | (m·s <sup>-1</sup> ) |
|--|----|-------------|-------------|----------------------|
|  | 7  | 0.439218812 | 0.35351833  | 0.052702412          |
|  | 9  | 0.373124371 | 0.322871136 | 0.056590557          |
|  | 11 | 0.347617594 | 0.311828515 | 0.058062832          |
|  | 13 | 0.333962426 | 0.306123714 | 0.058940597          |
|  | 15 | 0.325431054 | 0.302637557 | 0.059416993          |
|  | 20 | 0.31361168  | 0.297911551 | 0.060471669          |
|  | 25 | 0.307492651 | 0.295513826 | 0.060425125          |

1

2

3

4

5

6 Mass transfer coefficients for CO<sub>2</sub> at 25 °C in the F core

| Distance from the Inlet (mm) | $k_{m1}$ (m·s <sup>-1</sup> ) | $k_{m2}$ (m·s <sup>-1</sup> ) | $D_{CO_2,eff}/W$<br>(m·s <sup>-1</sup> ) |
|------------------------------|-------------------------------|-------------------------------|------------------------------------------|
| 7                            | 0.093998884                   | 0.073021739                   | 0.013145216                              |
| 9                            | 0.075420298                   | 0.062117786                   | 0.015289199                              |
| 11                           | 0.06781366                    | 0.05791548                    | 0.017432889                              |
| 13                           | 0.063587295                   | 0.055667497                   | 0.020156473                              |
| 15                           | 0.060877637                   | 0.05426373                    | 0.021265373                              |
| 20                           | 0.057017283                   | 0.052319959                   | 0.026652079                              |
| 25                           | 0.054961682                   | 0.051314148                   | 0.030493746                              |

7

8 Mass transfer coefficients for CO<sub>2</sub> at 25 °C in the B core

| Distance from the Inlet (mm) | $k_{m1}$ (m·s <sup>-1</sup> ) | $k_{m2}$ (m·s <sup>-1</sup> ) | $D_{CO_2,eff}/W$ |
|------------------------------|-------------------------------|-------------------------------|------------------|
|------------------------------|-------------------------------|-------------------------------|------------------|

|  |    |             |             | (m·s <sup>-1</sup> ) |
|--|----|-------------|-------------|----------------------|
|  | 7  | 0.093998884 | 0.073021739 | 0.0242582            |
|  | 9  | 0.075420298 | 0.062117786 | 0.025240099          |
|  | 11 | 0.06781366  | 0.05791548  | 0.026011776          |
|  | 13 | 0.063587295 | 0.055667497 | 0.027659157          |
|  | 15 | 0.060877637 | 0.05426373  | 0.028046992          |
|  | 20 | 0.057017283 | 0.052319959 | 0.029298976          |
|  | 25 | 0.054961682 | 0.051314148 | 0.030010386          |

1

2

3

4

5

6 Mass transfer coefficients for CO<sub>2</sub> at 100 °C in the F core

| Distance from the Inlet (mm) | $k_{m1}$ (m·s <sup>-1</sup> ) | $k_{m2}$ (m·s <sup>-1</sup> ) | $D_{CO_2,eff}/W$<br>(m·s <sup>-1</sup> ) |
|------------------------------|-------------------------------|-------------------------------|------------------------------------------|
| 7                            | 0.123526235                   | 0.099326851                   | 0.018273718                              |
| 9                            | 0.102041219                   | 0.087267925                   | 0.020623205                              |
| 11                           | 0.093511213                   | 0.082763953                   | 0.024937328                              |
| 13                           | 0.088866411                   | 0.080395441                   | 0.030024296                              |
| 15                           | 0.085931067                   | 0.078932446                   | 0.031457386                              |
| 20                           | 0.081815334                   | 0.076928632                   | 0.034145788                              |
| 25                           | 0.079659319                   | 0.075902388                   | 0.034794269                              |

7

8 Mass transfer coefficients for CO<sub>2</sub> at 100 °C in the B core

| Distance from the Inlet (mm) | $k_{m1}$ (m·s <sup>-1</sup> ) | $k_{m2}$ (m·s <sup>-1</sup> ) | $D_{CO_2,eff}/W$ |
|------------------------------|-------------------------------|-------------------------------|------------------|
|------------------------------|-------------------------------|-------------------------------|------------------|

|  |    |             |             | (m·s <sup>-1</sup> ) |
|--|----|-------------|-------------|----------------------|
|  | 7  | 0.123526235 | 0.099326851 | 0.034313916          |
|  | 9  | 0.102041219 | 0.087267925 | 0.034992958          |
|  | 11 | 0.093511213 | 0.082763953 | 0.035600665          |
|  | 13 | 0.088866411 | 0.080395441 | 0.035850817          |
|  | 15 | 0.085931067 | 0.078932446 | 0.036085833          |
|  | 20 | 0.081815334 | 0.076928632 | 0.037645784          |
|  | 25 | 0.079659319 | 0.075902388 | 0.038647973          |

1

2

3

4

5

6 Mass transfer coefficients for CO<sub>2</sub> at 200 °C in the F core

| Distance from the Inlet (mm) | $k_{m1}$ (m·s <sup>-1</sup> ) | $k_{m2}$ (m·s <sup>-1</sup> ) | $D_{CO_2,eff}/W$<br>(m·s <sup>-1</sup> ) |
|------------------------------|-------------------------------|-------------------------------|------------------------------------------|
| 7                            | 0.168661726                   | 0.139908154                   | 0.02364265                               |
| 9                            | 0.143072111                   | 0.126077763                   | 0.024082207                              |
| 11                           | 0.133182358                   | 0.121033142                   | 0.03443944                               |
| 13                           | 0.12788341                    | 0.118411748                   | 0.037120997                              |
| 15                           | 0.124570957                   | 0.116804277                   | 0.040995756                              |
| 20                           | 0.119979298                   | 0.114617964                   | 0.045843295                              |
| 25                           | 0.117600853                   | 0.113505453                   | 0.046494963                              |

7

8 Mass transfer coefficients for CO<sub>2</sub> at 200 °C in the B core

| Distance from the Inlet (mm) | $k_{m1}$ (m·s <sup>-1</sup> ) | $k_{m2}$ (m·s <sup>-1</sup> ) | $D_{CO_2,eff}/W$ |
|------------------------------|-------------------------------|-------------------------------|------------------|
|------------------------------|-------------------------------|-------------------------------|------------------|

|    |             |             | (m·s <sup>-1</sup> ) |
|----|-------------|-------------|----------------------|
| 7  | 0.168661726 | 0.139908154 | 0.046964976          |
| 9  | 0.143072111 | 0.126077763 | 0.047533584          |
| 11 | 0.133182358 | 0.121033142 | 0.048452186          |
| 13 | 0.12788341  | 0.118411748 | 0.049591493          |
| 15 | 0.124570957 | 0.116804277 | 0.050558547          |
| 20 | 0.119979298 | 0.114617964 | 0.052025628          |
| 25 | 0.117600853 | 0.113505453 | 0.053055179          |

1

2 Fig. 8: Validation of MM assumption of O<sub>2</sub> in the B core

| Temp. (°C) | $D_{O_2,eff}/W_{,EXP}$ (m·s <sup>-1</sup> ) | $D_{O_2,eff}/W_{,CAL}$ (m·s <sup>-1</sup> ) |
|------------|---------------------------------------------|---------------------------------------------|
| 25         | 0.035513616                                 | 0.030660377                                 |
| 100        | 0.050378416                                 | 0.045125786                                 |
| 200        | 0.069921154                                 | 0.068081761                                 |

3 Validation of MM assumption of CO in the B core

| Temp. (°C) | $D_{CO,eff}/W_{,EXP}$ (m·s <sup>-1</sup> ) | $D_{CO,eff}/W_{,CAL}$ (m·s <sup>-1</sup> ) |
|------------|--------------------------------------------|--------------------------------------------|
| 25         | 0.034339736                                | 0.030345912                                |
| 100        | 0.045651243                                | 0.044654088                                |
| 200        | 0.068087169                                | 0.067295597                                |

4

5 Validation of MM assumption of CO<sub>2</sub> in the B core

| Temp. (°C) | $D_{CO_2,eff}/W_{,EXP}$ (m·s <sup>-1</sup> ) | $D_{CO_2,eff}/W_{,CAL}$ (m·s <sup>-1</sup> ) |
|------------|----------------------------------------------|----------------------------------------------|
| 25         | 0.027217941                                  | 0.022484277                                  |
| 100        | 0.036162564                                  | 0.033962264                                  |
| 200        | 0.049740227                                  | 0.051415094                                  |

6

1 Fig. 9: Validation of MK assumption of O<sub>2</sub> at 9 mm from the entrance of the F core

| Temp. (°C) | $D_{O_2,eff}/W_{,EXP}$ (m·s <sup>-1</sup> ) | $D_{O_2,eff}/W_{,CAL}$ (m·s <sup>-1</sup> ) |
|------------|---------------------------------------------|---------------------------------------------|
| 25         | 0.017475901                                 | 0.017800557                                 |
| 100        | 0.024662943                                 | 0.023682504                                 |
| 200        | 0.031978946                                 | 0.031450927                                 |

2

3 Validation of MK assumption of CO at 9 mm from the entrance of the F core

| Temp. (°C) | $D_{CO,eff}/W_{,EXP}$<br>(m·s <sup>-1</sup> ) | $D_{CO,eff}/W_{,CAL}$ (m·s <sup>-1</sup> ) |
|------------|-----------------------------------------------|--------------------------------------------|
| 25         | 0.019051968                                   | 0.01806924                                 |
| 100        | 0.022889793                                   | 0.024154096                                |
| 200        | 0.03313571                                    | 0.032235223                                |

4

5

6 Validation of MK assumption of CO<sub>2</sub> at 9 mm from the entrance of the F core

| Temp. (°C) | $D_{CO_2,eff}/W_{,EXP}$ (m·s <sup>-1</sup> ) | $D_{CO_2,eff}/W_{,CAL}$ (m·s <sup>-1</sup> ) |
|------------|----------------------------------------------|----------------------------------------------|
| 25         | 0.015289199                                  | 0.013699873                                  |
| 100        | 0.020623205                                  | 0.018703523                                  |
| 200        | 0.024082207                                  | 0.02510858                                   |

7

8 Fig. S.7: Parity plots between the experimentally measured and calculated internal mass transfer

9 coefficients in the F and B core for O<sub>2</sub>

| 25 °C                                          |                                                | 100 °C                                         |                                                | 200 °C                                         |                                                |
|------------------------------------------------|------------------------------------------------|------------------------------------------------|------------------------------------------------|------------------------------------------------|------------------------------------------------|
| $D_{O_2,eff}/W_{,EXP}$<br>(m·s <sup>-1</sup> ) | $D_{O_2,eff}/W_{,CAL}$<br>(m·s <sup>-1</sup> ) | $D_{O_2,eff}/W_{,EXP}$<br>(m·s <sup>-1</sup> ) | $D_{O_2,eff}/W_{,CAL}$<br>(m·s <sup>-1</sup> ) | $D_{O_2,eff}/W_{,EXP}$<br>(m·s <sup>-1</sup> ) | $D_{O_2,eff}/W_{,CAL}$<br>(m·s <sup>-1</sup> ) |
| 0.014980316                                    | 0.016949673                                    | 0.020740091                                    | 0.021558867                                    | 0.02723286                                     | 0.027432808                                    |

|             |             |             |             |             |             |
|-------------|-------------|-------------|-------------|-------------|-------------|
| 0.017475901 | 0.018426412 | 0.024662943 | 0.023720201 | 0.031978946 | 0.030581651 |
| 0.018511994 | 0.02296352  | 0.030527507 | 0.032152253 | 0.045501115 | 0.045907592 |
| 0.023339679 | 0.026148029 | 0.03500084  | 0.036611026 | 0.053867828 | 0.052273912 |
| 0.026375128 | 0.0287044   | 0.038511705 | 0.040190317 | 0.055204795 | 0.05738449  |
| 0.030272441 | 0.030705703 | 0.041390763 | 0.04299243  | 0.058464847 | 0.061385401 |
| 0.034630477 | 0.030705703 | 0.043649533 | 0.04299243  | 0.060423259 | 0.061385401 |
| 0.035513616 | 0.032315017 | 0.050378416 | 0.045245702 | 0.069921154 | 0.064602665 |
| 0.035513616 | 0.032315017 | 0.050378416 | 0.045245702 | 0.069921154 | 0.064602665 |
| 0.035513616 | 0.032315017 | 0.050378416 | 0.045245702 | 0.069921154 | 0.064602665 |
| 0.035513616 | 0.032315017 | 0.050378416 | 0.045245702 | 0.069921154 | 0.064602665 |
| 0.035513616 | 0.032315017 | 0.050378416 | 0.045245702 | 0.069921154 | 0.064602665 |
| 0.035513616 | 0.032315017 | 0.050378416 | 0.045245702 | 0.069921154 | 0.064602665 |
| 0.035513616 | 0.032315017 | 0.050378416 | 0.045245702 | 0.069921154 | 0.064602665 |
| 0.035513616 | 0.032315017 | 0.050378416 | 0.045245702 | 0.069921154 | 0.064602665 |

1

2 Parity plots between the experimentally measured and calculated internal mass transfer coefficients in  
3 the F and B core for CO

| 25 °C                                         |                                               | 100 °C                                        |                                               | 200 °C                                        |                                               |
|-----------------------------------------------|-----------------------------------------------|-----------------------------------------------|-----------------------------------------------|-----------------------------------------------|-----------------------------------------------|
| $D_{CO,eff}/W_{,EXP}$<br>( $m \cdot s^{-1}$ ) | $D_{CO,eff}/W_{,CAL}$<br>( $m \cdot s^{-1}$ ) | $D_{CO,eff}/W_{,EXP}$<br>( $m \cdot s^{-1}$ ) | $D_{CO,eff}/W_{,CAL}$<br>( $m \cdot s^{-1}$ ) | $D_{CO,eff}/W_{,EXP}$<br>( $m \cdot s^{-1}$ ) | $D_{CO,eff}/W_{,CAL}$<br>( $m \cdot s^{-1}$ ) |
| 0.015841483                                   | 0.017284165                                   | 0.020526153                                   | 0.022077568                                   | 0.025652906                                   | 0.028222053                                   |
| 0.019051968                                   | 0.018714837                                   | 0.022889793                                   | 0.024188859                                   | 0.03313571                                    | 0.031326024                                   |
| 0.022826511                                   | 0.022716083                                   | 0.029025222                                   | 0.031805805                                   | 0.042317144                                   | 0.045412927                                   |
| 0.027911769                                   | 0.025866278                                   | 0.032568647                                   | 0.036216534                                   | 0.047994837                                   | 0.051710648                                   |
| 0.029143205                                   | 0.028395104                                   | 0.037239018                                   | 0.039757256                                   | 0.050731717                                   | 0.056766158                                   |
| 0.030168884                                   | 0.030374842                                   | 0.04067544                                    | 0.042529177                                   | 0.054321372                                   | 0.060723958                                   |
| 0.031917159                                   | 0.030374842                                   | 0.041965132                                   | 0.042529177                                   | 0.057936582                                   | 0.060723958                                   |
| 0.034339736                                   | 0.031966815                                   | 0.045651243                                   | 0.044758169                                   | 0.058087169                                   | 0.063906556                                   |

|             |             |             |             |             |             |
|-------------|-------------|-------------|-------------|-------------|-------------|
| 0.034339736 | 0.031966815 | 0.045651243 | 0.044758169 | 0.058087169 | 0.063906556 |
| 0.034339736 | 0.031966815 | 0.045651243 | 0.044758169 | 0.058087169 | 0.063906556 |
| 0.034339736 | 0.031966815 | 0.045651243 | 0.044758169 | 0.058087169 | 0.063906556 |
| 0.034339736 | 0.031966815 | 0.045651243 | 0.044758169 | 0.058087169 | 0.063906556 |
| 0.034339736 | 0.031966815 | 0.045651243 | 0.044758169 | 0.058087169 | 0.063906556 |
| 0.034339736 | 0.031966815 | 0.045651243 | 0.044758169 | 0.058087169 | 0.063906556 |

1

2

3

4

5

6

7

8 Parity plots between the experimentally measured and calculated internal mass transfer coefficients in  
9 the F and B core for CO<sub>2</sub>

| 25 °C                                           |                                                 | 100 °C                                          |                                                 | 200 °C                                          |                                                 |
|-------------------------------------------------|-------------------------------------------------|-------------------------------------------------|-------------------------------------------------|-------------------------------------------------|-------------------------------------------------|
| $D_{CO_2,eff}/W_{,EXP}$<br>(m·s <sup>-1</sup> ) | $D_{CO_2,eff}/W_{,CAL}$<br>(m·s <sup>-1</sup> ) | $D_{CO_2,eff}/W_{,EXP}$<br>(m·s <sup>-1</sup> ) | $D_{CO_2,eff}/W_{,CAL}$<br>(m·s <sup>-1</sup> ) | $D_{CO_2,eff}/W_{,EXP}$<br>(m·s <sup>-1</sup> ) | $D_{CO_2,eff}/W_{,CAL}$<br>(m·s <sup>-1</sup> ) |
| 0.013145216                                     | 0.013328547                                     | 0.018273718                                     | 0.01707485                                      | 0.02364265                                      | 0.021896915                                     |
| 0.015289199                                     | 0.014392103                                     | 0.020623205                                     | 0.018653343                                     | 0.024082207                                     | 0.024232242                                     |
| 0.017432889                                     | 0.017163465                                     | 0.024937328                                     | 0.024031336                                     | 0.03443944                                      | 0.034312393                                     |
| 0.020156473                                     | 0.01954364                                      | 0.030024296                                     | 0.027363925                                     | 0.037120997                                     | 0.039070727                                     |
| 0.021265373                                     | 0.021454331                                     | 0.031457386                                     | 0.03003917                                      | 0.040995756                                     | 0.042890491                                     |
| 0.026652079                                     | 0.022950151                                     | 0.034145788                                     | 0.032133534                                     | 0.045843295                                     | 0.045880864                                     |
| 0.030493746                                     | 0.022950151                                     | 0.034794269                                     | 0.032133534                                     | 0.046494963                                     | 0.045880864                                     |
| 0.027217941                                     | 0.024152989                                     | 0.036162564                                     | 0.033817681                                     | 0.049740227                                     | 0.048285521                                     |

|             |             |             |             |             |             |
|-------------|-------------|-------------|-------------|-------------|-------------|
| 0.027217941 | 0.024152989 | 0.036162564 | 0.033817681 | 0.049740227 | 0.048285521 |
| 0.027217941 | 0.024152989 | 0.036162564 | 0.033817681 | 0.049740227 | 0.048285521 |
| 0.027217941 | 0.024152989 | 0.036162564 | 0.033817681 | 0.049740227 | 0.048285521 |
| 0.027217941 | 0.024152989 | 0.036162564 | 0.033817681 | 0.049740227 | 0.048285521 |
| 0.027217941 | 0.024152989 | 0.036162564 | 0.033817681 | 0.049740227 | 0.048285521 |
| 0.027217941 | 0.024152989 | 0.036162564 | 0.033817681 | 0.049740227 | 0.048285521 |

1  
2  
3  
4  
5  
6  
7  
8  
9

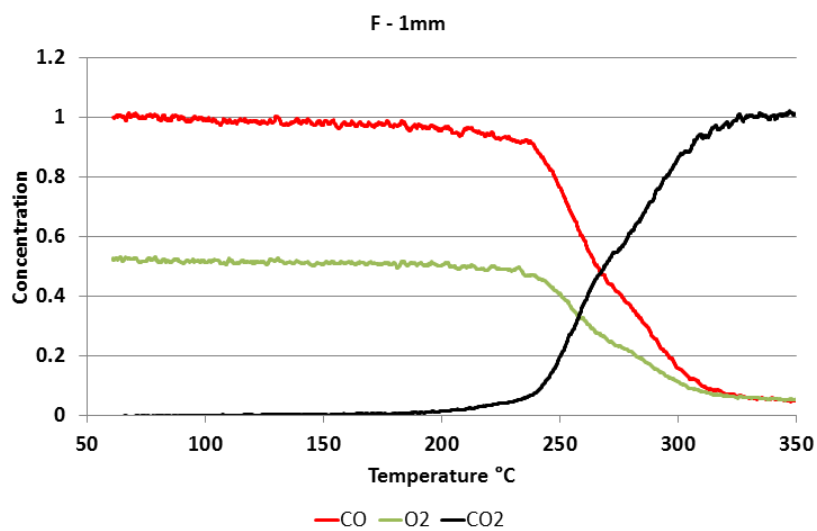

10



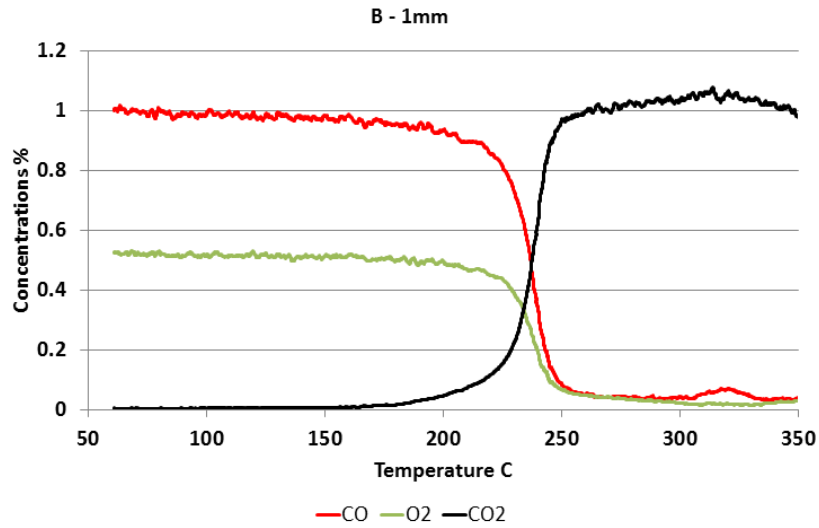

1

2 Fig. S.8. Light-off profiles for (up) F and (down) B core at 1 mm from inlet; Concentrations of CO, O<sub>2</sub>  
 3 and CO<sub>2</sub>.

4

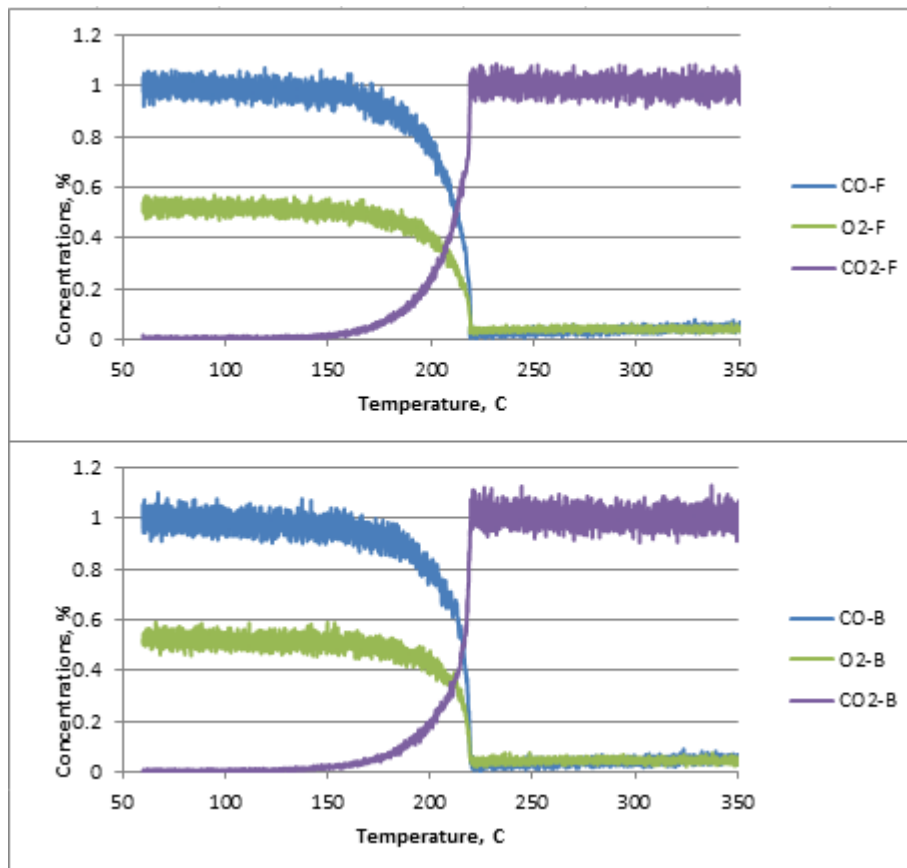

5

6 Fig. S.9. Light-off profiles for (up) F and (down) B core at 9 mm from inlet; Concentrations of CO, O<sub>2</sub>  
 7 and CO<sub>2</sub>.
